# Supplementary material
Source: Springer Nature journal article supplement (https://www.springermedizin.de/resource/supplementary/12890_2012_355_MOESM2_ESM.pdf/9505034)

**A**

weaning and score ADL

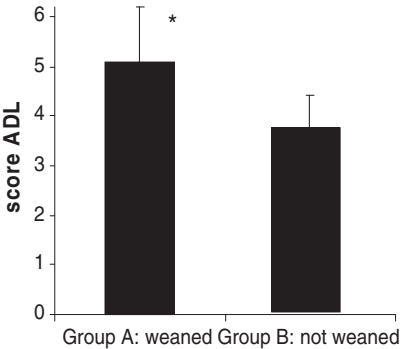**B**

Percentage of weaning success according to ADL score

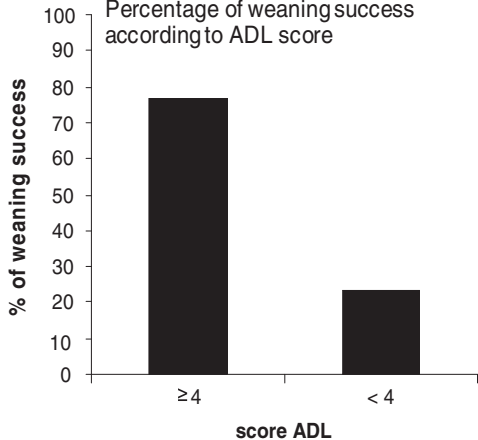

Supplement: MOESM2 [file 9505034]
